# Supplementary material for: Immobilization of TiO2 Semiconductor Nanoparticles onto Posidonia Oceanica Fibers for Photocatalytic Phenol Degradation
Source: MDPI journal article supplement (doi:10.3390/w13212948), 2021-10-20
Supplement: s1 [file s1]

Archive with 1 entries (1 files):
- water-1420990-supplementary.pdf
